# Supplementary material for: Epidemiology and Viral Etiology of Pediatric Immune Thrombocytopenia through Korean Public Health Data Analysis
Source: PubMed Central journal article supplement (PMC8037772; doi:10.3390/jcm10071356), 2021-03-25
Supplement: jcm-10-01356-s001.pdf [file jcm-10-01356-s001.pdf]

# Supplementary Data

**Figure S1.** Residual ACF (Auto Correlation Function) correlogram and 95% confidence limits for newly diagnosed pediatric immune thrombocytopenia.

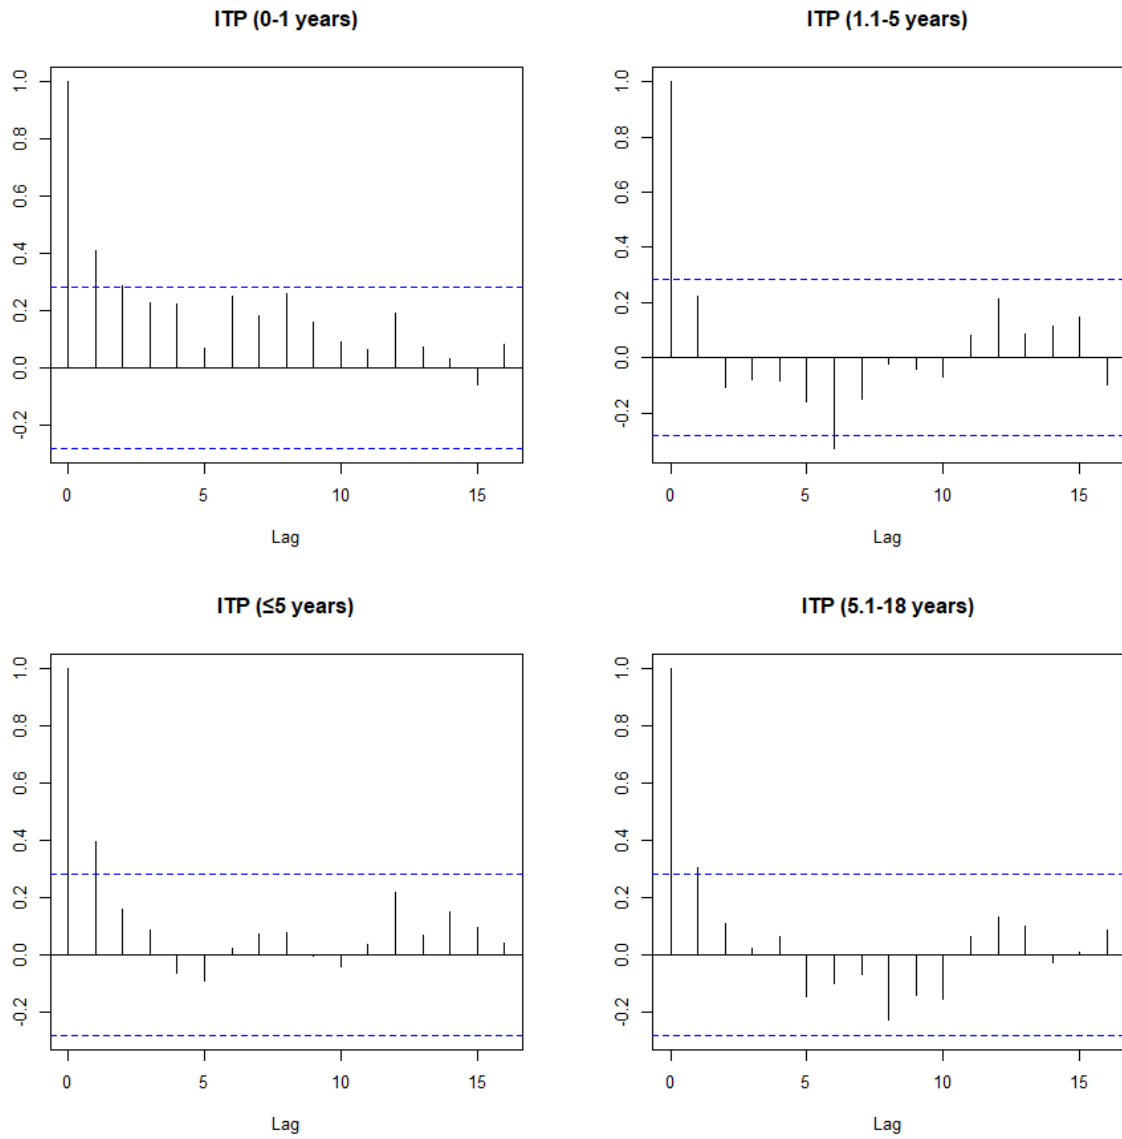

ITP, immune thrombocytopenia

**Figure S2.** Residual ACF correlogram and 95% confidence limits according to virus.

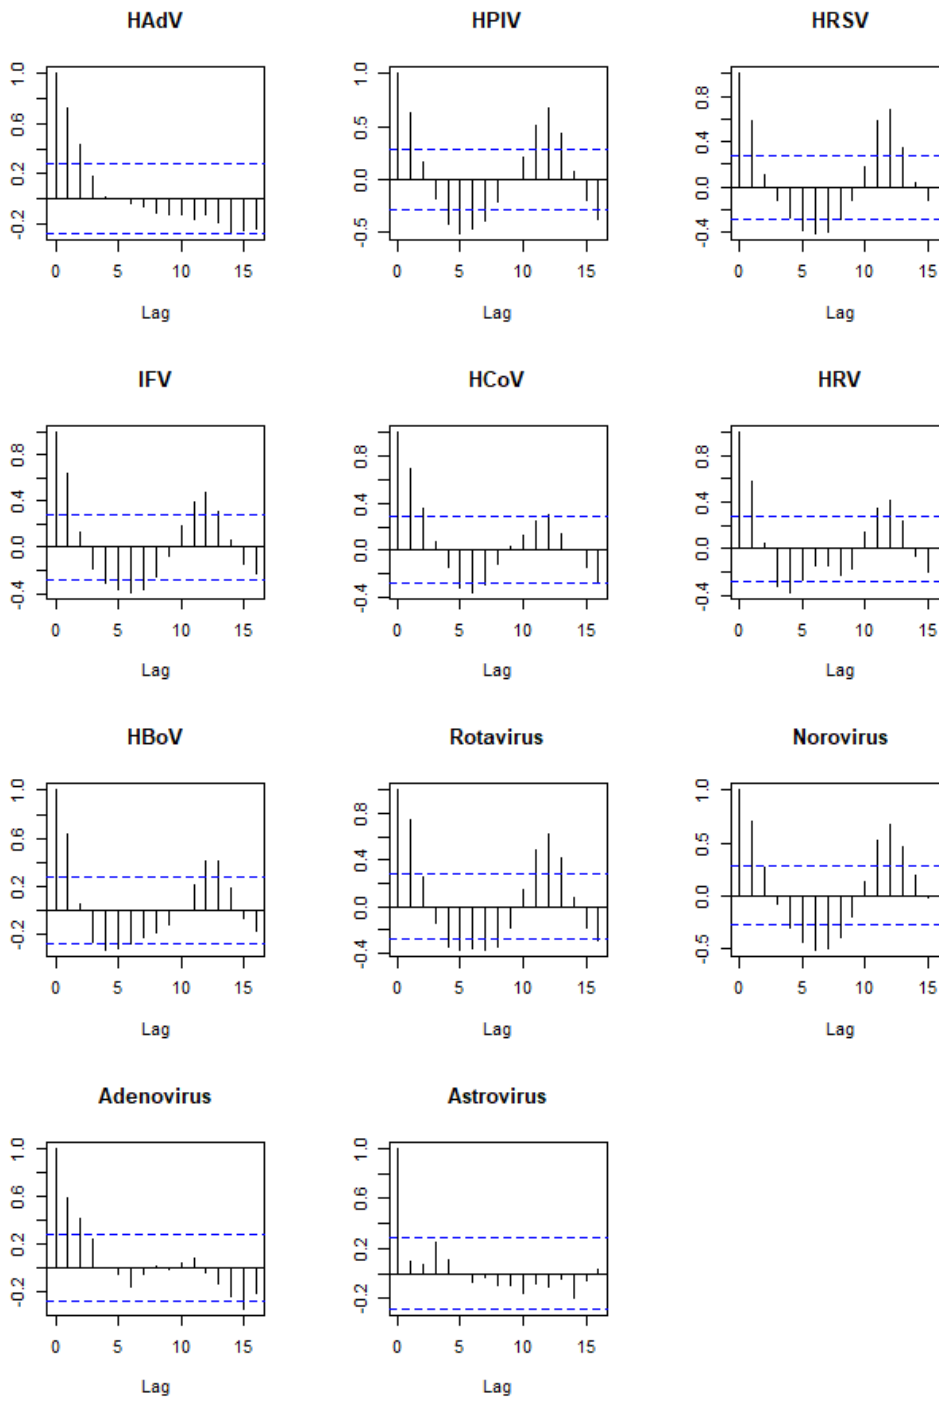

HAdV, adenovirus; HPIV, parainfluenza virus; HRSV, human respiratory syncytial virus; IFV, influenza virus; HCoV, coronavirus; HRV, rhinovirus; HBoV, bocavirus

**Figure S3.** Correlation between incidence of immune thrombocytopenia and virus positive detection rate

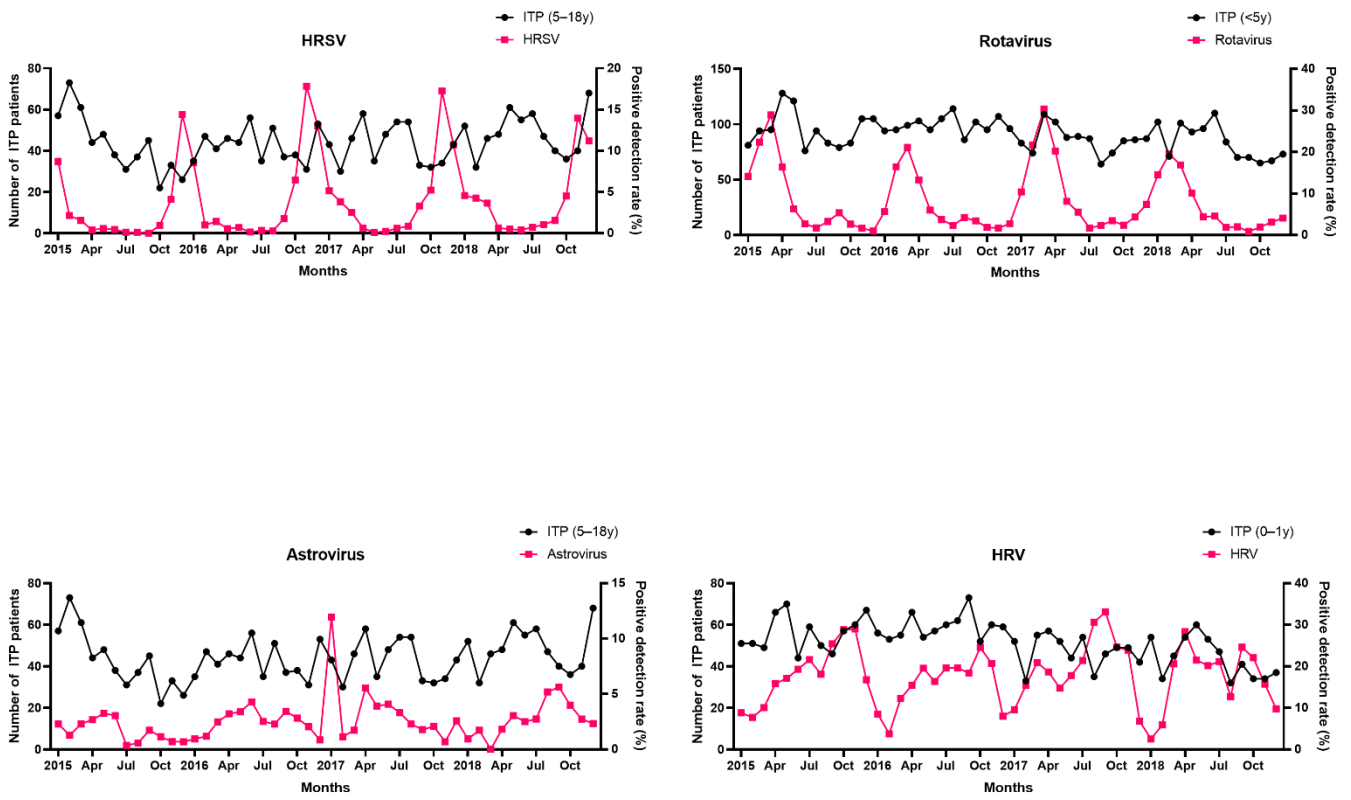

ITP, immune thrombocytopenia; HRSV, human respiratory syncytial virus; HRV, rhinovirus

**Table S1.** Diseases and codes of purpura and other hemorrhagic conditions.

| <b>Diagnosis</b>                           | <b>Code</b> |
|--------------------------------------------|-------------|
| Allergic purpura                           |             |
| Anaphylactoid purpura                      |             |
| Henoch-Schönlein purpura                   |             |
| Haemorrhagic nonthrombocytopenic purpura   | D690        |
| Idiopathic nonthrombocytopenic purpura     |             |
| Vascular purpura                           |             |
| Vasculitis, allergic                       |             |
| Qualitative platelet defects               |             |
| Bernard-Soulier (giant platelet) syndrome  |             |
| Glanzmann's disease                        | D691        |
| Grey platelet syndrome                     |             |
| Thromboasthenia (haemorrhagic, hereditary) |             |
| Thrombocytopathy                           |             |
| Qualitative platelet defects               |             |
| Bernard-Soulier [giant platelet] syndrome  | D692        |
| Glanzmann's disease                        |             |
| Grey platelet syndrome                     |             |
| Evans syndrome                             | D6930       |
| Other primary thrombocytopenia             | D694        |
| Secondary thrombocytopenia                 | D695        |
| Thrombocytopenia, unspecified              | D696        |
| Other specified hemorrhagic conditions     |             |
| Capillary fragility (hereditary)           | D698        |
| Vascular pseudothrombophilia               |             |
| Hemorrhagic condition, unspecified         | D699        |

**Table S2.** Causes of secondary immune thrombocytopenia.

| <b>Diagnosis</b>                           | <b>Code</b>                           |
|--------------------------------------------|---------------------------------------|
| Malignancies                               |                                       |
| In situ neoplasms                          | D00–D09                               |
| Malignant neoplasms                        | C00–C97                               |
| Hematological malignancies                 | C77, C81–C96                          |
| Lymphoma                                   | C915, C81–C88                         |
| Hodgkin lymphoma                           | C81                                   |
| B-cell chronic lymphocytic leukemia        | C911                                  |
| Multiple myeloma and plasma cell neoplasms | C90                                   |
| Waldenström macroglobulinaemia             | C880                                  |
| Myelodysplastic syndromes                  | D46                                   |
| Infection or immunodeficiency              |                                       |
| Viral hepatitis C or B                     | B16, B171, B180–B182                  |
| Viral hepatitis C                          | B171, B182                            |
| Viral hepatitis B                          | B16, B180–B181                        |
| Human immunodeficiency virus disease       | B20–B24                               |
| Immunodeficiency                           | D80–D84                               |
| Autoimmune disease                         |                                       |
| Connective tissue disease                  | M32–M351                              |
| Systemic lupus erythematosus               | M32                                   |
| Systemic sclerosis                         | M34                                   |
| Dermatopolymyositis                        | M33                                   |
| Sicca syndrome                             | M350                                  |
| Mixed connective tissue disease            | M351                                  |
| Rheumatoid arthritis                       | M05, M060, M062–M063, M068–M069, M080 |
| Other autoimmune hemolytic anemias         | D591                                  |
| Antiphospholipid syndrome                  | D686                                  |
| Sarcoidosis                                | D86                                   |

**Table S3.** Monthly numbers of newly diagnosed pediatric immune thrombocytopenia (ITP) patients in Korea.

|         | Jan   | Feb   | Mar   | Apr   | May   | Jun   | Jul   | Aug   | Sep   | Oct   | Nov   | Dec   | Total  | Average |
|---------|-------|-------|-------|-------|-------|-------|-------|-------|-------|-------|-------|-------|--------|---------|
| 2015    | 138   | 167   | 156   | 172   | 169   | 114   | 125   | 120   | 124   | 105   | 138   | 131   | 1659   | 138.3   |
| 2016    | 129   | 142   | 140   | 149   | 139   | 161   | 149   | 137   | 139   | 133   | 138   | 149   | 1705   | 142.1   |
| 2017    | 126   | 104   | 155   | 160   | 123   | 137   | 141   | 118   | 107   | 117   | 120   | 130   | 1538   | 128.2   |
| 2018    | 154   | 103   | 147   | 141   | 157   | 165   | 142   | 117   | 110   | 101   | 107   | 141   | 1585   | 132.1   |
| Total   | 547   | 516   | 598   | 622   | 588   | 577   | 557   | 492   | 480   | 456   | 503   | 551   | 6487   | 540.6   |
| Average | 136.8 | 129.0 | 149.5 | 155.5 | 147.0 | 144.3 | 139.3 | 123.0 | 120.0 | 114.0 | 125.8 | 137.8 | 1621.8 | 135.1   |

**Table S4.** Parameters of ARIMA models for ITP patients by age.

| <b>Parameters.</b> | <b>0–1 Years</b> | <b>1.1–5 Years</b> | <b>5.1–18 Years</b> | <b>Total</b> |
|--------------------|------------------|--------------------|---------------------|--------------|
| p autoregressive   | 1                | 1                  | 1                   | 1            |
| d difference       | 0                | 0                  | 0                   | 0            |
| q moving average   | 1                | 2                  | 4                   | 0            |
| AIC                | 342.81           | 344.95             | 366.96              | 490.1        |

AIC, Akaike's Information Criterion.

**Table S5.** Positive detection rates of viruses during the study period.

| <b>Mon</b>     |                          |            |            |            |            |            |            |            |            |            |            |            |
|----------------|--------------------------|------------|------------|------------|------------|------------|------------|------------|------------|------------|------------|------------|
| <b>PDR (%)</b> | <b>Jan</b>               | <b>Feb</b> | <b>Mar</b> | <b>Apr</b> | <b>May</b> | <b>Jun</b> | <b>Jul</b> | <b>Aug</b> | <b>Sep</b> | <b>Oct</b> | <b>Nov</b> | <b>Dec</b> |
|                | <b>HAdV</b>              |            |            |            |            |            |            |            |            |            |            |            |
| 2015           | 5.04                     | 2.15       | 2.83       | 4.70       | 4.83       | 5.63       | 3.32       | 3.18       | 2.30       | 6.98       | 9.03       | 8.78       |
| 2016           | 9.18                     | 3.88       | 3.93       | 5.54       | 6.53       | 6.95       | 7.16       | 9.48       | 9.58       | 6.50       | 5.83       | 3.24       |
| 2017           | 3.72                     | 2.53       | 2.43       | 2.74       | 6.05       | 4.73       | 2.96       | 5.18       | 4.33       | 3.78       | 4.73       | 2.60       |
| 2018           | 2.98                     | 2.80       | 4.25       | 5.38       | 5.45       | 6.80       | 5.82       | 9.55       | 13.33      | 11.30      | 10.70      | 7.63       |
|                | <b>HPIV</b>              |            |            |            |            |            |            |            |            |            |            |            |
| 2015           | 0.92                     | 0.55       | 0.78       | 6.30       | 17.65      | 11.75      | 7.04       | 6.28       | 8.93       | 4.72       | 9.53       | 4.08       |
| 2016           | 2.24                     | 1.30       | 1.40       | 5.60       | 16.55      | 16.23      | 9.68       | 10.25      | 8.68       | 4.56       | 1.95       | 0.78       |
| 2017           | 1.58                     | 1.70       | 2.98       | 8.38       | 19.43      | 12.83      | 9.68       | 8.95       | 4.60       | 3.04       | 3.33       | 2.68       |
| 2018           | 0.84                     | 1.60       | 3.25       | 9.44       | 19.10      | 16.78      | 11.12      | 7.75       | 4.33       | 4.00       | 1.75       | 1.03       |
|                | <b>HRSV</b>              |            |            |            |            |            |            |            |            |            |            |            |
| 2015           | 8.70                     | 2.15       | 1.55       | 0.40       | 0.58       | 0.45       | 0.12       | 0.13       | 0.00       | 0.96       | 4.13       | 14.40      |
| 2016           | 8.56                     | 1.00       | 1.43       | 0.56       | 0.70       | 0.15       | 0.34       | 0.28       | 1.78       | 6.46       | 17.83      | 13.02      |
| 2017           | 5.16                     | 3.83       | 2.53       | 0.64       | 0.10       | 0.23       | 0.60       | 0.85       | 3.30       | 5.24       | 17.25      | 10.73      |
| 2018           | 4.58                     | 4.25       | 3.65       | 0.64       | 0.50       | 0.40       | 0.72       | 1.05       | 1.55       | 4.52       | 13.95      | 11.20      |
|                | <b>IFV</b>               |            |            |            |            |            |            |            |            |            |            |            |
| 2015           | 22.80                    | 48.85      | 45.28      | 25.96      | 3.10       | 0.33       | 0.14       | 0.00       | 0.38       | 0.10       | 0.48       | 1.53       |
| 2016           | 15.24                    | 47.55      | 36.95      | 26.60      | 5.00       | 0.70       | 0.22       | 0.28       | 0.25       | 0.40       | 0.80       | 35.50      |
| 2017           | 26.20                    | 7.70       | 8.95       | 12.72      | 5.03       | 2.20       | 1.10       | 0.55       | 0.93       | 0.66       | 4.05       | 41.55      |
| 2018           | 58.50                    | 35.63      | 10.55      | 3.46       | 2.80       | 1.08       | 0.50       | 0.30       | 0.58       | 1.78       | 11.15      | 35.35      |
|                | <b>HCoV</b>              |            |            |            |            |            |            |            |            |            |            |            |
| 2015           | 8.74                     | 1.40       | 0.95       | 0.56       | 0.10       | 0.50       | 0.58       | 0.60       | 0.38       | 1.38       | 1.80       | 5.53       |
| 2016           | 7.96                     | 3.98       | 4.95       | 4.26       | 4.90       | 3.08       | 3.94       | 4.53       | 4.68       | 4.24       | 7.80       | 9.82       |
| 2017           | 10.26                    | 6.45       | 5.15       | 3.62       | 2.68       | 2.35       | 1.02       | 1.45       | 1.55       | 2.14       | 5.15       | 7.20       |
| 2018           | 6.76                     | 9.88       | 7.73       | 3.52       | 0.85       | 0.48       | 1.00       | 3.13       | 2.60       | 5.80       | 10.93      | 9.83       |
|                | <b>HRV</b>               |            |            |            |            |            |            |            |            |            |            |            |
| 2015           | 8.80                     | 7.73       | 10.08      | 15.84      | 17.10      | 19.30      | 21.62      | 18.10      | 25.40      | 28.82      | 29.03      | 16.78      |
| 2016           | 8.52                     | 3.78       | 12.28      | 15.44      | 19.55      | 16.38      | 19.62      | 19.60      | 18.40      | 24.56      | 20.68      | 8.02       |
| 2017           | 9.56                     | 15.40      | 20.90      | 18.66      | 14.78      | 17.78      | 21.40      | 30.63      | 33.10      | 24.68      | 23.88      | 6.83       |
| 2018           | 2.52                     | 5.95       | 20.63      | 28.34      | 21.53      | 20.18      | 21.14      | 12.70      | 24.63      | 22.08      | 15.70      | 9.78       |
|                | <b>HBoV</b>              |            |            |            |            |            |            |            |            |            |            |            |
| 2015           | 0.58                     | 0.70       | 0.68       | 5.18       | 9.05       | 8.18       | 2.46       | 0.18       | 0.00       | 0.56       | 0.23       | 0.55       |
| 2016           | 1.06                     | 0.83       | 1.93       | 3.86       | 4.55       | 2.80       | 1.06       | 1.15       | 0.83       | 0.30       | 0.25       | 0.30       |
| 2017           | 0.58                     | 1.00       | 1.35       | 4.66       | 9.33       | 3.98       | 0.82       | 0.30       | 0.25       | 0.18       | 0.20       | 0.58       |
| 2018           | 0.26                     | 0.70       | 0.10       | 0.88       | 4.35       | 7.18       | 5.78       | 0.55       | 0.63       | 0.60       | 0.85       | 0.88       |
|                | <b>HMPV</b>              |            |            |            |            |            |            |            |            |            |            |            |
| 2015           | 0.66                     | 0.40       | 0.98       | 3.64       | 7.10       | 4.20       | 1.48       | 0.33       | 0.13       | 0.46       | 0.43       | 1.68       |
| 2016           | 3.56                     | 4.20       | 8.05       | 12.64      | 8.53       | 2.83       | 0.66       | 1.20       | 0.98       | 0.42       | 1.05       | 1.14       |
| 2017           | 4.76                     | 11.10      | 16.38      | 14.14      | 4.80       | 0.63       | 0.56       | 0.10       | 0.00       | 0.76       | 0.60       | 0.28       |
| 2018           | 0.86                     | 2.95       | 8.60       | 19.12      | 15.33      | 6.00       | 2.82       | 0.73       | 0.48       | 0.08       | 0.18       | 0.15       |
|                | <b>Group A Rotavirus</b> |            |            |            |            |            |            |            |            |            |            |            |
| 2015           | 14.10                    | 22.35      | 28.90      | 16.38      | 6.33       | 2.70       | 1.72       | 3.25       | 5.38       | 2.62       | 1.65       | 0.98       |
| 2016           | 5.66                     | 16.45      | 21.08      | 13.28      | 6.03       | 3.73       | 2.30       | 4.20       | 3.43       | 1.86       | 1.68       | 2.76       |
| 2017           | 10.38                    | 21.68      | 30.33      | 20.26      | 8.13       | 5.53       | 1.68       | 2.30       | 3.45       | 2.34       | 4.35       | 7.38       |
| 2018           | 14.52                    | 19.53      | 16.88      | 10.10      | 4.38       | 4.55       | 1.84       | 1.98       | 0.85       | 1.90       | 3.13       | 4.10       |
|                | <b>Norovirus</b>         |            |            |            |            |            |            |            |            |            |            |            |
| 2015           | 29.20                    | 15.30      | 13.35      | 5.82       | 7.53       | 6.73       | 4.86       | 3.20       | 6.18       | 10.36      | 26.28      | 43.98      |
| 2016           | 38.62                    | 21.85      | 20.33      | 13.64      | 7.80       | 4.08       | 3.66       | 3.40       | 2.65       | 9.32       | 28.58      | 41.06      |



|                           |       |       |       |       |       |       |      |      |       |      |       |       |
|---------------------------|-------|-------|-------|-------|-------|-------|------|------|-------|------|-------|-------|
| 2017                      | 30.28 | 20.00 | 21.08 | 19.18 | 18.58 | 10.40 | 3.72 | 6.20 | 4.23  | 8.06 | 33.40 | 39.58 |
| 2018                      | 25.46 | 19.20 | 10.78 | 15.74 | 9.30  | 9.90  | 4.34 | 3.20 | 5.35  | 6.28 | 14.95 | 16.90 |
| <b>Enteric Adenovirus</b> |       |       |       |       |       |       |      |      |       |      |       |       |
| 2015                      | 1.68  | 3.03  | 1.55  | 1.70  | 2.30  | 1.05  | 0.28 | 0.00 | 0.60  | 2.22 | 0.55  | 1.80  |
| 2016                      | 2.28  | 2.58  | 1.25  | 2.30  | 2.28  | 2.75  | 2.16 | 3.43 | 10.73 | 6.88 | 5.68  | 6.78  |
| 2017                      | 2.10  | 2.23  | 0.55  | 2.86  | 2.90  | 3.05  | 2.78 | 3.30 | 3.50  | 5.04 | 3.43  | 1.13  |
| 2018                      | 2.40  | 1.85  | 2.55  | 3.04  | 2.85  | 5.65  | 4.44 | 6.45 | 6.03  | 3.82 | 3.33  | 2.15  |
| <b>Astrovirus</b>         |       |       |       |       |       |       |      |      |       |      |       |       |
| 2015                      | 2.30  | 1.28  | 2.30  | 2.68  | 3.25  | 3.05  | 0.36 | 0.58 | 1.73  | 1.14 | 0.70  | 0.68  |
| 2016                      | 0.94  | 1.18  | 2.48  | 3.20  | 3.40  | 4.30  | 2.52 | 2.28 | 3.43  | 2.82 | 2.05  | 0.86  |
| 2017                      | 11.96 | 1.15  | 1.73  | 5.54  | 3.90  | 4.08  | 3.32 | 2.30 | 1.78  | 2.08 | 0.68  | 2.58  |
| 2018                      | 0.94  | 1.73  | 0.00  | 1.82  | 3.05  | 2.50  | 2.74 | 5.18 | 5.63  | 3.98 | 2.73  | 2.33  |

---
